# Supplementary material for: Drug-Tolerant Mycobacterium tuberculosis Adopt Different Survival Strategies in Alveolar Macrophages of Patients with Pulmonary Tuberculosis
Source: MDPI journal article supplement (doi:10.3390/ijms241914942), 2023-10-06
Supplement: s1 [file s1]

# Supplementary Materials

Figure S1

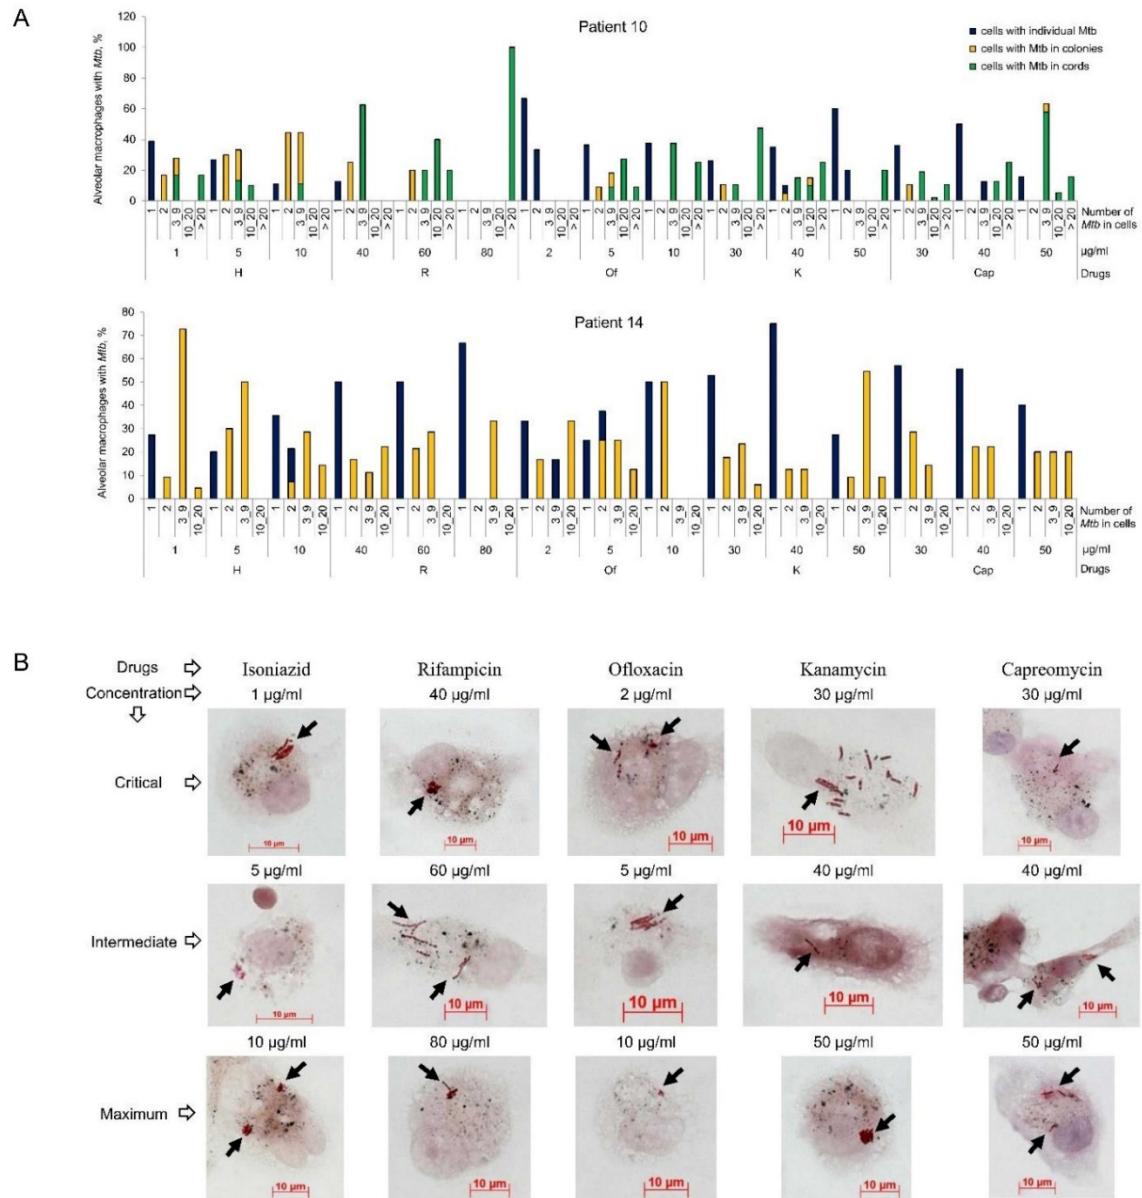

**Figure S1.** *M. tuberculosis* (*Mtb*) are able to survive exposure to different concentrations of anti-TB drugs in the *ex vivo* cultures of alveolar macrophages obtained from the distant lung tissues of patient 10 with XDR-TB and patient 14 with isoniazid-resistant TB. **(a)** The number of alveolar macrophages with a particular number of acid-fast *Mtb* in them expressed as the percentage of the total number of infected alveolar macrophages does not change significantly between the *ex vivo* cell cultures exposed to different concentrations of anti-TB drugs during three days. Drugs: H, isoniazid; R, rifampicin; Of, ofloxacin; K, kanamycin; Cap, capreomycin. **(b)** The colonies of acid-fast *Mtb* stained by the ZN method and indicated by black arrows are demonstrated on representative images of viable alveolar macrophages without apoptotic or necrotic morphology exposed to different concentrations of anti-TB drugs in *ex vivo* culture during three days for patient 14. The scale bars are 10  $\mu$ m each.

Figure S2

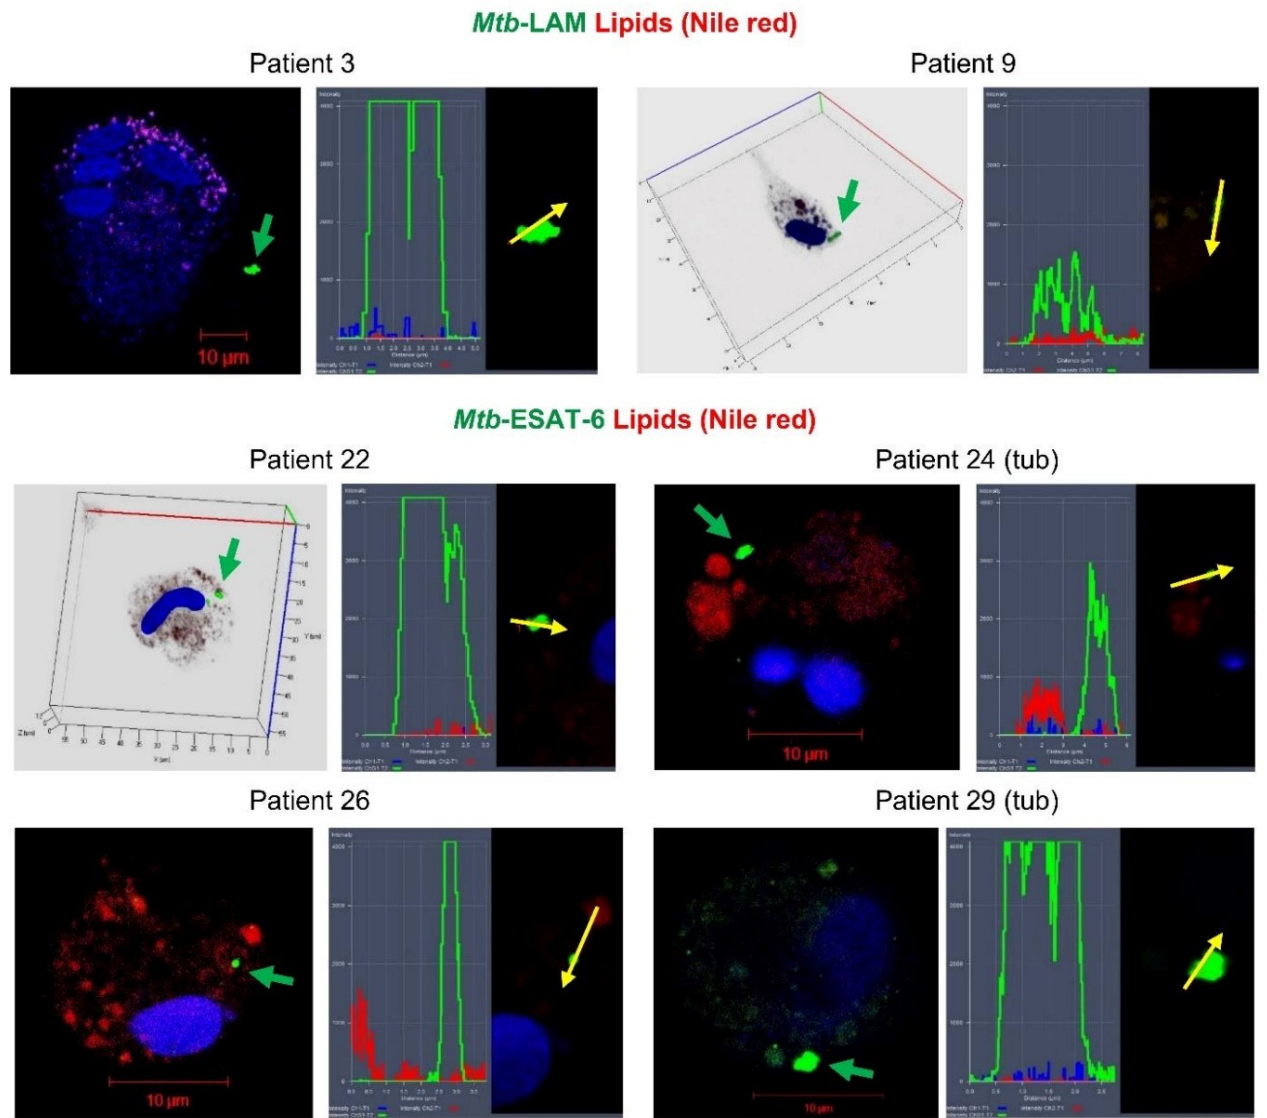

**Figure S2.** Intracellular lipophilic inclusions are not found in the *Mtb* located both within and outside the alveolar macrophages obtained from the tuberculoma walls (tub) and the tissues distant from the macro-TB lesions of the patients' resected lung parts on representative confocal 3D or single immunofluorescent images stained by the *Mtb* LAM- or ESAT-6-specific antibodies (green signal) and Nile red dye (red signal) after *ex vivo* culture for 16-18 hours. Nuclei are stained by DAPI (blue signal). Green arrows point to *Mtb* (solitary or as colonies). To the right of these images: the profile images of the arrow-marked *Mtb* shown. Yellow arrows point to the areas for constructing profile graphs. The scale bars are 10 µm each.

Figure S3

A

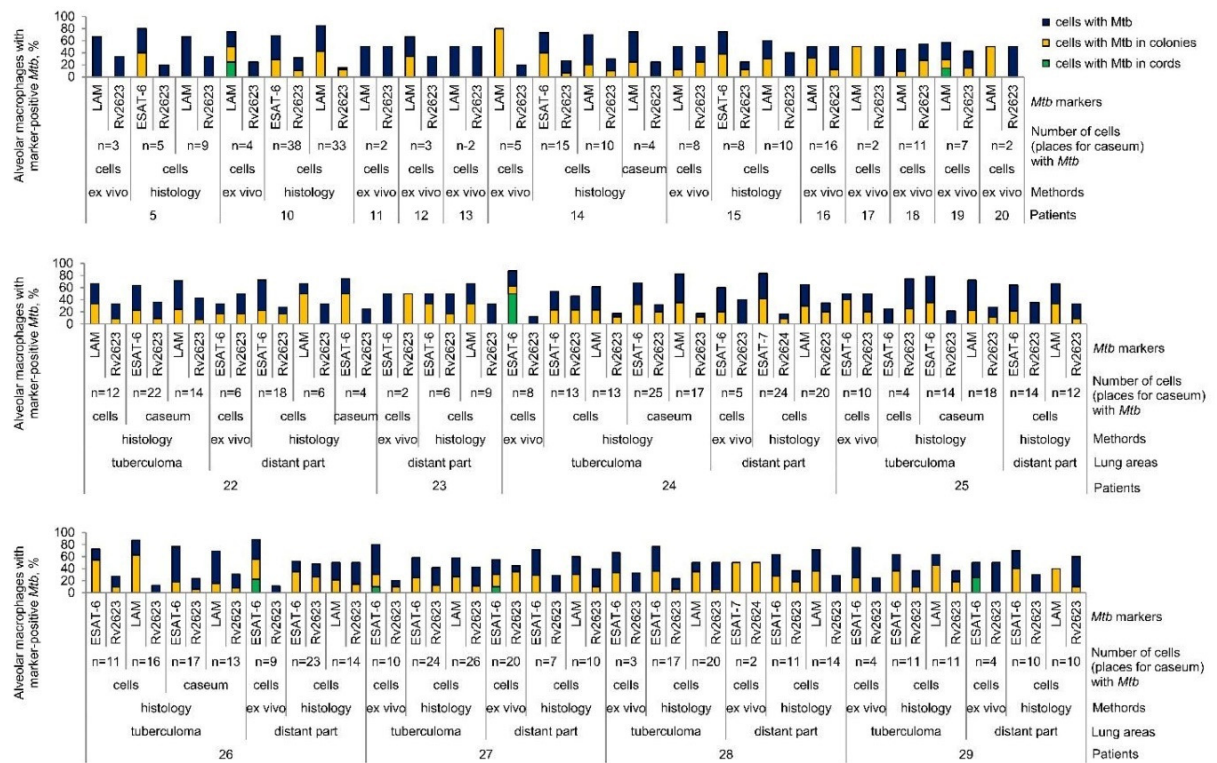

B

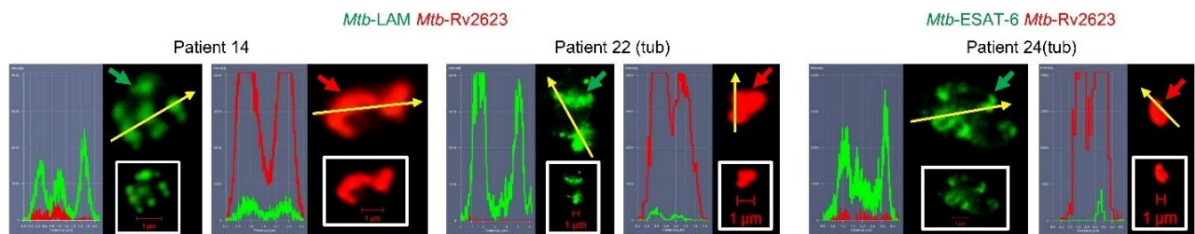

C

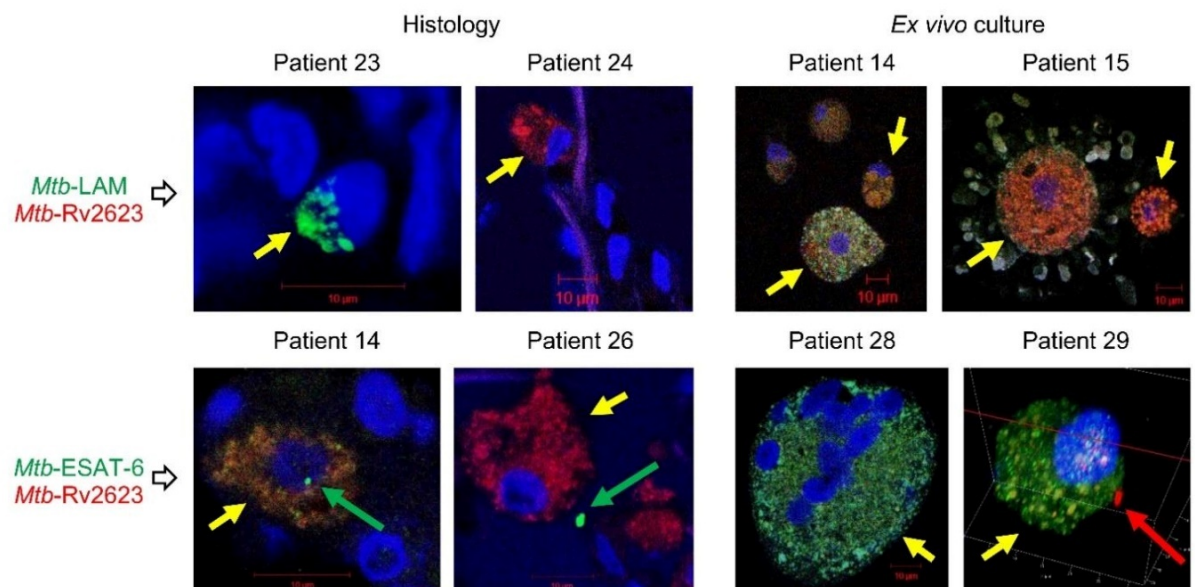

**Figure S3.** Rv2623-positive *Mtb* present in alveolar macrophages and necrotic caseum in various lung TB lesions of all the patients studied. **(a)** The number of alveolar macrophages or caseous regions with LAM- or ESAT-6- and Rv2623-positive *Mtb* (solitary or as colonies) and with *Mtb* colonies (including those with cording morphology) is expressed as the percentage of the total number of host cells or caseous regions with LAM- or ESAT-6- and Rv2623-positive *Mtb* analyzed simultaneously in them on the histological sections and after *ex vivo* culture for 16-18 hours; **(b)** Representative profile images demonstrate LAM- or ESAT-6-positive *Mtb* (green signal) not expressing Rv2623 protein and, conversely, Rv2623-positive *Mtb* (red signal) not expressing the virulence factors LAM and ESAT-6 in the caseous center of a small granuloma (only for patient 14) and tuberculomas (for other patients) on the histological sections. Yellow arrows point to the areas for constructing profile graphs. Close-ups of the images with the arrow-marked *Mtb* and the scale bar are shown in the lower right part of profile images. The scale bars are 1  $\mu\text{m}$  each; **(c)** The *Mtb* markers stained with antibodies reacting with *Mtb* LAM or ESAT-6 (green signal) and *Mtb* Rv2623 (red signal) often colocalize in the same intracellular vesicles of alveolar macrophages along with or without marker-positive *Mtb* in them on the histological sections and after *ex vivo* cell culture for 16-18 hours. Representative confocal immunofluorescent images are shown. Short yellow arrows point to the alveolar macrophages with intracellular vesicles in them. Long green and red arrows point to ESAT-6- and Rv2623-positive *Mtb*, respectively. The scale bars are 10  $\mu\text{m}$  each.



Figure S4

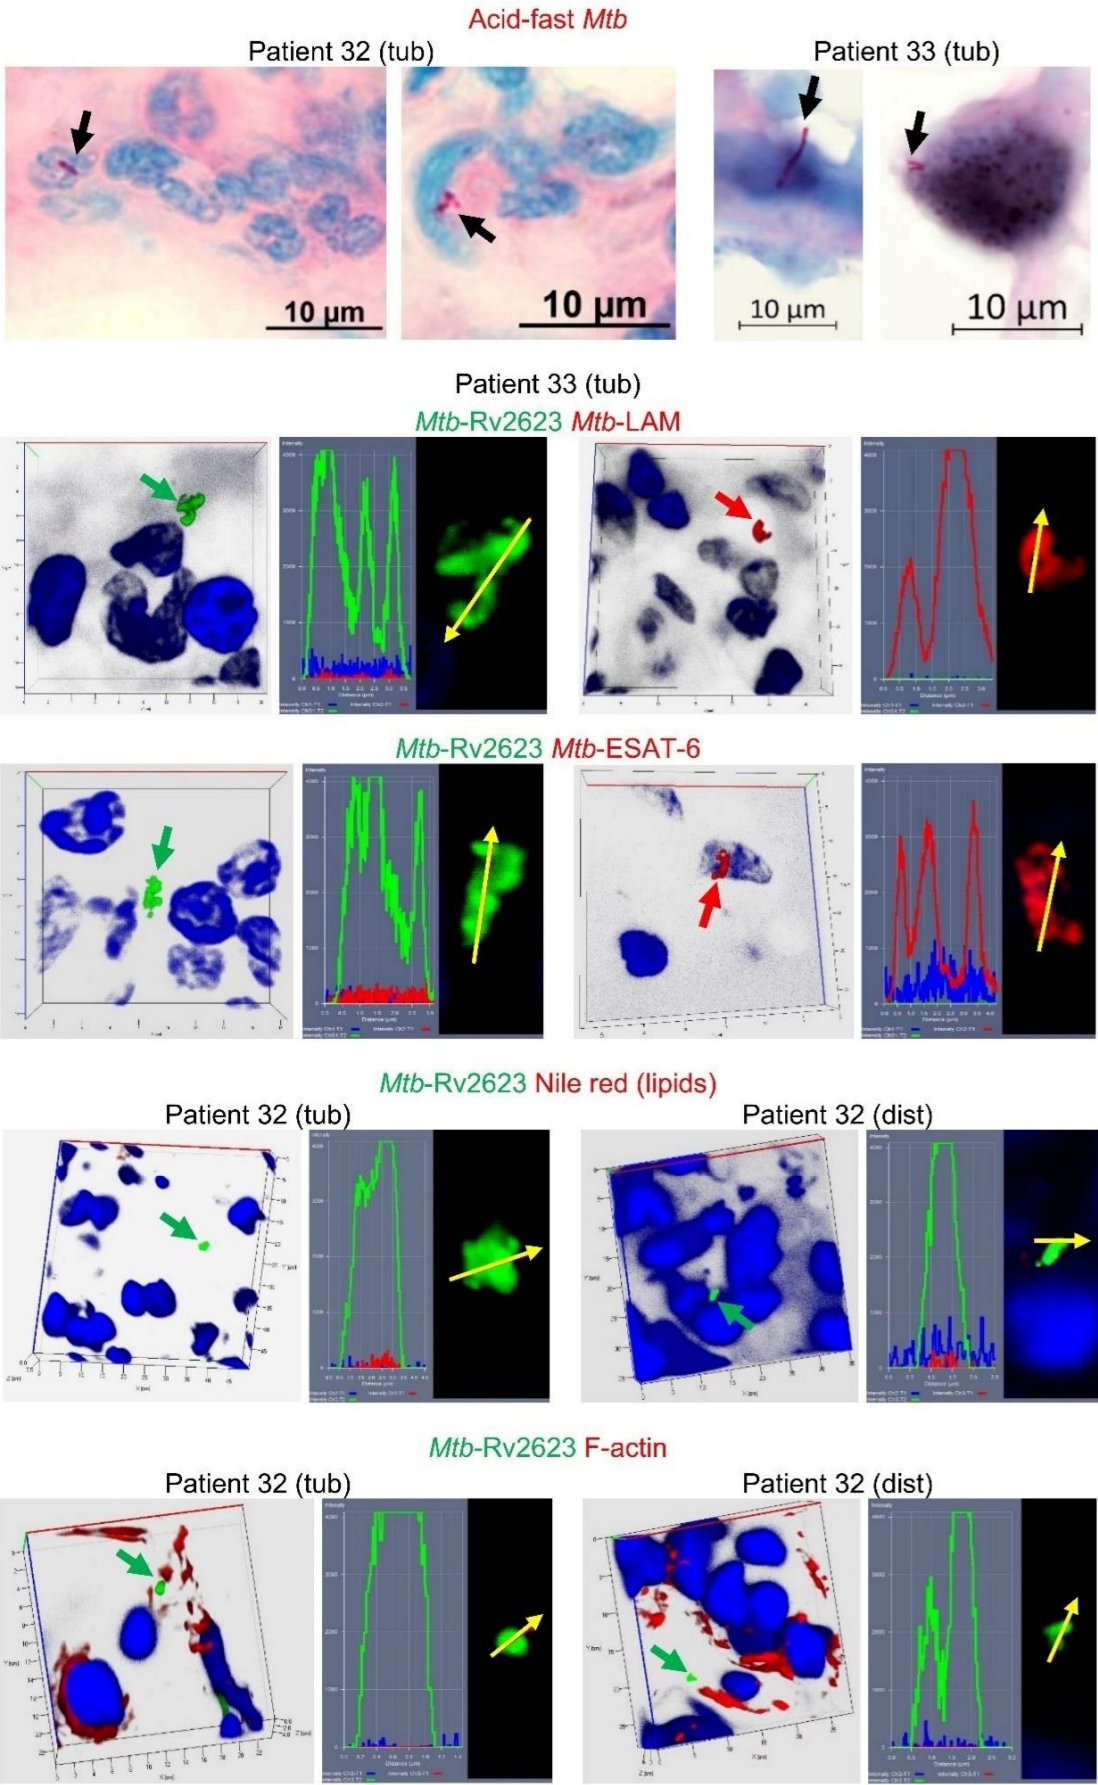

**Figure S4.** Rv2623-positive *Mtb* identified in alveolar macrophages in tuberculoma (tub) walls and tissues distant (dist) from the macro-TB lesions of patients 32 and 33 without any anti-TB treatment before surgery. Representative images of acid-fast *Mtb* after ZN staining are shown in the patients' alveolar macrophages on the histological sections. Representative confocal 3D immunofluorescent images simultaneously stained with appropriate specific antibodies and dyes demonstrate Rv2623-positive *Mtb* (green signal) not expressing the virulence factors LAM and ESAT-6 and, vice versa, LAM- or ESAT-6-positive *Mtb* (red signal) not expressing Rv2623 protein, the absence of intracellular lipophilic inclusions stained by the Nile red dye (red signal), and a lack of colocalization with filamentous actin stained by the Phalloidin dye (red signal) in Rv2623-positive *Mtb* (green signal) in alveolar macrophages on the histological sections. Nuclei are stained by DAPI (blue signal). Green, red, and black arrows point to Rv2623-, LAM- or ESAT-6-positive *Mtb*, and acid-fast *Mtb*, respectively. To the right of the 3D immunofluorescent images: profile images of the arrow-marked *Mtb*. Yellow arrows point to the areas for constructing profile graphs. The scale bars are 10  $\mu$ m each.

**Table S1.** Subpopulations (SP) of *Mtb* in alveolar macrophages of patients with pulmonary TB

| SP <sup>1</sup> | TB patients <sup>2</sup> |    |    |       |    |             |      |    |    |    |    |
|-----------------|--------------------------|----|----|-------|----|-------------|------|----|----|----|----|
|                 | 1, 11,<br>12, 21         | 2  | 3  | 4, 23 | 5  | 6 (cav), 10 | 7, 8 | 9  | 13 | 14 | 15 |
| 1               | +                        | +  | +  | +     | +  | +           | +    | +  | +  | +  | +  |
| 2               | -                        | +  | +  | +     | -  | +           | +    | +  | -  | -  | -  |
| 3               | -                        | -  | +  | +     | +  | +           | +    | +  | -  | +  | +  |
| 4               | -                        | -  | -  | +     | -  | +           | +    | +  | -  | -  | -  |
| 5               | -                        | -  | +  | -     | -  | -           | -    | -  | -  | -  | -  |
| 6               | -                        | -  | -  | -     | -  | +           | +    | -  | -  | -  | -  |
| 7               | -                        | -  | -  | +     | -  | +           | +    | +  | +  | +  | -  |
| 8               | ns                       | ns | ns | ns    | ns | ns          | ns   | ns | ns | +  | +  |
| 9               | +                        | +  | +  | +     | +  | +           | ns   | ns | +  | +  | +  |
| 10              | -                        | -  | +  | +     | -  | +           | ns   | ns | -  | +  | +  |

| SP <sup>1</sup> | TB patients <sup>2</sup> |    |    |    |    |    |    |        |      |            |      |
|-----------------|--------------------------|----|----|----|----|----|----|--------|------|------------|------|
|                 | 16                       | 17 | 18 | 19 | 20 | 22 | 26 | 24, 27 |      | 25, 28, 29 |      |
|                 |                          |    |    |    |    |    |    | tub    | dist | tub        | dist |
| 1               | +                        | +  | +  | +  | +  | +  | +  | +      |      | +          |      |
| 2               | -                        | +  | +  | -  | +  | +  | -  | +      | -    | -          |      |
| 3               | +                        | +  | +  | +  | -  | +  | +  | +      |      | +          |      |
| 4               | +                        | +  | +  | -  | -  | +  | -  | +      | -    | -          |      |
| 5               | -                        | -  | -  | +  | -  | +  | +  | -      | +    | -          |      |
| 6               | -                        | -  | +  | -  | -  | -  | -  | +      | -    | -          |      |
| 7               | -                        | -  | +  | -  | +  | ns | -  | +      | -    | -          |      |
| 8               | +                        | ns | +  | ns | ns | ns | ns | +      | -    | -          | ns   |
| 9               | +                        | +  | +  | +  | +  | +  | +  | +      |      | +          |      |
| 10              | +                        | -  | +  | +  | -  | +  | +  | +      |      | +          |      |

(+), is present; (-), is absent; ns, not studied.

<sup>1</sup> Description in Table 2.

<sup>2</sup> Alveolar macrophages were studied in the *ex vivo* cell cultures obtained from the cavity (cav) and tuberculoma (tub) walls and the tissues distant (dist or without labeling) from the macro-TB lesions of the patients' resected lung parts.
